# Supplementary material
Source: Research Square preprint supplement (doi:10.21203/rs.3.rs-9785007/v1)
Supplement: Supplementary file 1 [file 612935dcb2088f7ef1a8fca6.pdf]

Supplementary Information: Hierarchical Sparse  
Bayesian Multitask Learning for Disease  
Prediction in Pooled Microbiome Studies

Haonan Zhu<sup>1,2</sup>, Andre R. Goncalves<sup>1</sup>, Car Reen Kok<sup>1</sup>,  
Camilo Valdes<sup>1</sup>, Hiranmayi Ranganathan<sup>1</sup>, Boya Zhang<sup>1</sup>,  
Jose Manuel Marti<sup>1</sup>, Monica K. Borucki<sup>1</sup>, Nisha J. Mulakken<sup>1</sup>,  
James B. Thissen<sup>1</sup>, Crystal Jaing<sup>1</sup>, Alfred Hero<sup>2</sup>, Nicholas A. Be<sup>1\*</sup>

<sup>1</sup>Lawrence Livermore National Laboratory, Livermore, CA, USA.

<sup>2</sup>Electrical and Computer Engineering, University of Michigan, Ann  
Arbor, MI, USA.

\*Corresponding author(s). E-mail(s): [be1@llnl.gov](mailto:be1@llnl.gov);  
Contributing authors: [haonan@umich.edu](mailto:haonan@umich.edu); [goncalves1@llnl.gov](mailto:goncalves1@llnl.gov);

## 1 Dataset References

Table 1 lists all studies used in this work along with their metadata, including sample sizes, disease categories, and sequencing details. Some studies were obtained from the curatedMetagenomicData R package [1], which provides uniformly processed and annotated metagenomic datasets. All datasets used in this analysis are publicly available at <https://zenodo.org/records/17315984>.

001  
002  
003  
004  
005  
006  
007  
008  
009  
010  
011  
012  
013  
014  
015  
016  
017  
018  
019  
020  
021  
022  
023  
024  
025  
026  
027  
028  
029  
030  
031  
032  
033  
034  
035  
036  
037  
038  
039  
040  
041  
042  
043  
044  
045  
046

047 **Table 1:** Summary of microbiome studies by disease category. Two studies cover  
048 multiple conditions: [2] includes age-related macular degeneration and cardiovascular  
049 disease, while [3] covers six diseases — diabetes, neurological disease, irritable bowel  
050 syndrome, inflammatory bowel disease, gastrointestinal infection, and diarrhea. Both  
051 are split into separate entries by disease category for our analysis.  
052

| Disease Category           | Ref. | Host Body Site     | Geographic Location | Control and Disease Splits (C/D) |
|----------------------------|------|--------------------|---------------------|----------------------------------|
| Diabetes                   | [4]  | Fecal              | Europe              | 43/102                           |
|                            | [5]  | Fecal              | United States       | 17/19                            |
|                            | [6]  | Fecal              | Luxembourg          | 26/27                            |
|                            | [3]  | Fecal              | United States       | 359/19                           |
| Cirrhosis                  | [7]  | Fecal              | China               | 113/110                          |
|                            | [8]  | Fecal              | United States       | 77/9                             |
| Cancer                     | [9]  | Fecal              | Austria             | 61/93                            |
|                            | [10] | Fecal              | China               | 53/75                            |
|                            | [11] | Fecal              | North America       | 21/36                            |
|                            | [12] | Fecal              | Japan               | 250/365                          |
|                            | [13] | Fecal, Oral        | Not Available       | 470/90                           |
| Neurological Disease       | [14] | Oral               | United States       | 16/16                            |
|                            | [15] | Fecal              | United States       | 50/50                            |
|                            | [16] | Fecal              | China               | 40/40                            |
|                            | [17] | Fecal              | China               | 81/90                            |
|                            | [18] | Fecal, Oral        | South Korea         | 74/81                            |
|                            | [19] | Fecal              | Germany             | 100/75                           |
|                            | [20] | Fecal              | United States       | 233/491                          |
|                            | [3]  | Fecal              | United States       | 359/253                          |
| Diarrhea                   | [21] | Fecal, Rectal Swab | Bangladesh          | 7/23                             |
|                            | [22] | Fecal              | Bangladesh          | 9/18                             |
|                            | [3]  | Fecal              | United States       | 359/60                           |
| Dermatologic Disease       | [23] | Skin               | Asia                | 40/38                            |
|                            | [24] | Skin               | United States       | 53/238                           |
|                            | [25] | Skin               | Singapore           | 50/69                            |
|                            | [26] | Fecal              | United States       | 15/33                            |
| Gastrointestinal Infection | [27] | Fecal              | Canada              | 182/27                           |
|                            | [28] | Fecal              | Indonesia, Liberia  | 5/19                             |
|                            | [29] | Fecal              | Cameroon            | 86/89                            |
|                            | [3]  | Fecal              | United States       | 359/5                            |
|                            | [30] | Fecal              | United States       | 71/175                           |
| Inflammatory Bowel Disease | [31] | Fecal              | Not Available       | 56/162                           |
|                            | [32] | Fecal              | Not Available       | 354/888                          |
|                            |      |                    |                     |                                  |

Continued on next page

**Table 1 – continued from previous page**

| <b>Disease Category</b> | <b>Ref.</b> | <b>Host Body Site</b> | <b>Geographic Location</b> | <b>Control and Disease Splits (C/D)</b> |
|-------------------------|-------------|-----------------------|----------------------------|-----------------------------------------|
|                         | [33]        | Fecal                 | United States              | 27/8                                    |
|                         | [3]         | Fecal                 | United States              | 359/9                                   |
| Cardiovascular Disease  | [34]        | Fecal                 | China                      | 171/214                                 |
|                         | [35]        | Fecal                 | China                      | 41/155                                  |
|                         | [36]        | Fecal                 | China                      | 56/60                                   |
|                         | [37]        | Fecal                 | United States              | 27/127                                  |
|                         | [38]        | Fecal                 | China                      | 10/10                                   |
|                         | [2]         | Fecal                 | Switzerland                | 30/29                                   |
| Oral Disease            | [39]        | Oral                  | Australia                  | 37/48                                   |
|                         | [40]        | Oral                  | Italy                      | 51/23                                   |
|                         | [41]        | Oral                  | Hungary                    | 8/19                                    |
| Autoimmune Disease      | [42]        | Fecal                 | China                      | 45/20                                   |
|                         | [43]        | Fecal                 | China                      | 62/100                                  |

Continued on next page

093  
094  
095  
096  
097  
098  
099  
100  
101  
102  
103  
104  
105  
106  
107  
108  
109  
110  
111  
112  
113  
114  
115  
116  
117  
118  
119  
120  
121  
122  
123  
124  
125  
126  
127  
128  
129  
130  
131  
132  
133  
134  
135  
136  
137  
138

139  
140  
141  
142  
143  
144  
145  
146  
147  
148  
149  
150  
151  
152  
153  
154  
155  
156  
157  
158  
159  
160  
161  
162  
163  
164  
165  
166  
167  
168  
169  
170  
171  
172  
173  
174  
175  
176  
177  
178  
179  
180  
181  
182  
183  
184

**Table 1 – continued from previous page**

| Disease Category                 | Ref. | Host Body Site                       | Geographic Location | Control and Disease Splits (C/D) |
|----------------------------------|------|--------------------------------------|---------------------|----------------------------------|
| Immune Disease                   | [44] | Fecal                                | Spain               | 27/129                           |
| Pulmonary Disease                | [45] | Fecal                                | China               | 31/46                            |
|                                  | [46] | Cough Swabs                          | Germany             | 48/49                            |
|                                  | [47] | Fecal                                | China               | 15/55                            |
|                                  | [48] | Nasal                                | Sweden              | 20/37                            |
|                                  | [49] | Fecal                                | China               | 63/47                            |
|                                  | [50] | Lung (Bronchioalveolar Lavage Fluid) | China               | 16/45                            |
|                                  | [51] | Fecal                                | China               | 69/138                           |
|                                  | [52] | Fecal                                | China               | 21/20                            |
| Metabolic Disease                | [53] | Fecal                                | Mexico              | 10/10                            |
| Hormonal Disorder                | [54] | Fecal                                | China               | 43/50                            |
| Genitourinary Disease            | [55] | Endocervical, Vaginal, Rectal        | Fiji                | 11/14                            |
| Seafaring Syndrome               | [56] | Fecal                                | Not Available       | 99/55                            |
| Irritable Bowel Syndrome         | [3]  | Fecal                                | United States       | 359/52                           |
| Age-Related Macular Degeneration | [2]  | Fecal                                | Switzerland         | 33/57                            |

## 2 CAVI update derivation

This section includes the derivations of CAVI updates for Algorithm I.

Recall Equation 18 of [57] states that if we are to approximate a general posterior distribution  $p(\boldsymbol{\xi} \mid \text{data})$  with a mean-field approximation  $q(\boldsymbol{\xi}) := \prod_j q_j(\xi_j)$ , the CAVI update for  $j$ -th latent variable  $\xi_j$  (i.e., the optimal solution  $q_j^*(\xi_j)$ ) is proportional to the exponentiated conditional expected log of the joint:

$$q_j^* \propto \exp \left( \mathbb{E}_{\boldsymbol{\xi}_{-j} \sim q_{-j}} [\log (p(\xi_j, \boldsymbol{\xi}_{-j} \mid \text{data}))] \right). \quad (1)$$

where  $\xi_{-j}$  corresponds to all but the  $j$ -th latent variable. 185

**Update for  $\alpha, \beta$ .** 186

Based on Eqn. 1, the exponentiated conditional expectation of all the parameters 187  
except  $\theta$  up to a constant scaling factor: 188

$$\begin{aligned}
 q^*(\theta) &\propto \exp((\alpha_0 - 1) \log \theta + (\beta_0 - 1) \log(1 - \theta)) & 189 \\
 &\exp\left(\left(\sum_j \phi_j\right) \log \theta + \left(d - \sum_j \phi_j\right) \log(1 - \theta)\right) & 190 \\
 &= \exp\left(\left(\alpha_0 - 1 + \sum_j \phi_j\right) \log \theta\right) & 191 \\
 &\exp\left(\left(\beta_0 + d - \sum_j \phi_j - 1\right) \log(1 - \theta)\right). & 192
 \end{aligned}$$

This implies  $q^*(\theta)$  follows a beta distribution with parameters: 193

$$\begin{aligned}
 \alpha &= \alpha_0 + \sum_j \phi_j, & 194 \\
 \beta &= \beta_0 + d - \sum_j \phi_j. & 195
 \end{aligned}$$

**Update for  $v$  and  $\mathbf{V}$ .** Based on Eqn. 1, the exponentiated conditional expectation 196  
of all the parameters except  $\Sigma_0^{-1}$  up to a constant scaling factor: 197

$$\begin{aligned}
 q^*(\Sigma_0^{-1}) &\propto \exp\left(-\frac{1}{2} \text{tr}(\mathbf{V}_0^{-1} \Sigma_0^{-1})\right) & 198 \\
 &\exp\left(-\frac{v_0 + d - T - 1}{2} \log \det(\Sigma_0^{-1})\right) & 199 \\
 &\exp\left(-\frac{1}{2} \text{tr}\left(\Sigma_0^{-1} \left(\sum_j \mathbf{m}_{(j)} \mathbf{m}_{(j)}^\top + \Sigma_j\right)\right)\right). & 200
 \end{aligned}$$

This implies  $q^*(\Sigma_0^{-1})$  follow a Wishart distribution with parameters: 201

$$\begin{aligned}
 v &= v_0 + d, & 202 \\
 \mathbf{V} &= \left(\mathbf{V}_0^{-1} + \sum_j \mathbf{m}_{(j)} \mathbf{m}_{(j)}^\top + \Sigma_j\right)^{-1}. & 203
 \end{aligned}$$

231 **Update for  $\Sigma_j$ .** all the terms involve  $\Sigma_j$  in ELBO approximation (Eqn. 3, section  
 232 III.A):

$$233 \quad -\frac{1}{2} \text{tr}(v\mathbf{V}\Sigma_j) - \frac{1}{8} \sum_t (\Sigma_j)_{t,t} \phi_j \sum_i (x_t^{ij})^2 + \frac{1}{2} \log \det(\Sigma_j).$$

235 Rewrite the second term:

$$237 \quad -\frac{1}{8} \text{tr} \left( \Sigma_j \text{diag} \left( \left[ \sum_i \phi_j (x_1^{ij})^2, \dots, \sum_i \phi_j (x_T^{ij})^2 \right]^\top \right) \right).$$

241 Denote the diagonal matrix as  $\tilde{\mathbf{X}}_j$ . For every  $j$ , we have a constrained optimization  
 242 problem:

$$243 \quad \max_{\Sigma \in \mathbb{S}_{++}^T} \log \det(\Sigma) - \text{tr} \left( \Sigma \left( v\mathbf{V} + \frac{1}{4} \tilde{\mathbf{X}}_j \right) \right).$$

245 which admits a closed form solution:

$$247 \quad \Sigma_j^* = \left( v\mathbf{V} + \frac{1}{4} \tilde{\mathbf{X}}_j \right)^{-1}. \quad (2)$$

250 for  $j = 1, \dots, d$ .

251 **Update for  $\mathbf{m}_{(j)}$ .** all the terms involved  $\mathbf{m}_{(j)}$  in ELBO approximation (Eqn. 3,  
 252 section III.A):

$$253 \quad -\frac{v}{2} \langle \mathbf{m}_{(j)}, \mathbf{V} \mathbf{m}_{(j)} \rangle - \frac{1}{8} \langle \mathbf{m}_{(j)}, \tilde{\mathbf{X}}_j \mathbf{m}_{(j)} \rangle$$

$$255 \quad + \left\langle \mathbf{m}_{(j)}, \left[ \dots, \phi_j \sum_i (y_t^i - \tilde{y}_t^i) x_t^{ij}, \dots \right]^\top \right\rangle$$

$$257 \quad + \frac{1}{4} \left\langle \mathbf{m}_{(j)}, \left[ \dots, \phi_j \sum_i \langle \mathbf{w}'_t \circ \mathbf{z}', \mathbf{x}_t^i \rangle x_t^{ij}, \dots \right]^\top \right\rangle$$

$$259 \quad - \frac{1}{4} \left\langle \mathbf{m}_{(j)}, \left[ \dots, \phi_j \sum_i x_t^{ij} \sum_{l \neq j} \phi_l x_t^{il} m_{tl}, \dots \right]^\top \right\rangle.$$

263 This problem is quadratic with a negative definite Hessian matrix, hence by stationary  
 264 condition (i.e., zero gradient) we have closed form updates:

$$266 \quad \Sigma_j^* \left( \left[ \dots, \phi_j \sum_i (y_t^i - \tilde{y}_t^i) x_t^{ij}, \dots \right]^\top \right.$$

$$267 \quad \left. + \frac{1}{4} \left[ \dots, \phi_j \sum_i \langle \mathbf{w}'_t \circ \mathbf{z}', \mathbf{x}_t^i \rangle x_t^{ij}, \dots \right]^\top \right.$$

$$269 \quad \left. - \frac{1}{4} \left[ \dots, \phi_j \sum_i x_t^{ij} \sum_{l \neq j} \phi_l x_t^{il} m_{tl}, \dots \right]^\top \right).$$

271  
 272  
 273  
 274  
 275  
 276

For all  $j = 1 \dots, d$ . When the reference point of quadratic lower bound  $\mathbf{w}' \circ \mathbf{z}'$  is set to be the mean parameters from the previous iteration, we can simplify Eqn. 4:

$$\begin{aligned} & \Sigma_j^* \left[ \phi_j \sum_i (y_1^i - \tilde{y}_1^i) x_1^{ij}, \dots, \phi_j \sum_i (y_T^i - \tilde{y}_T^i) x_T^{ij} \right]^\top \\ & + \frac{1}{4} \left[ \phi_j^2 \sum_i (x_1^{ij})^2 m_{1j}^{(k)}, \dots, \phi_j^2 \sum_i (x_T^{ij})^2 m_{Tj}^{(k)} \right]^\top. \end{aligned} \quad (4)$$

#### Update for $\phi_j$ .

All the terms involve  $\phi_j$  in ELBO approximation (Eqn. 3, section III.A):

$$\begin{aligned} f(\phi_j) & := \phi_j (\psi(\alpha) - \psi(\beta)) + \phi_j \sum_t \sum_i (y_t^i - \tilde{y}_t^i) m_{tj} x_t^{ij} \\ & + \frac{\phi_j}{4} \sum_t \sum_i (m_{tj} x_t^{ij}) \langle \mathbf{w}'_t \circ \mathbf{z}', \mathbf{x}_t^i \rangle \\ & - \frac{\phi_j}{4} \sum_t \sum_i m_{tj} x_t^{ij} \sum_{l \neq j} m_{tl} \phi_l x_t^{il} \\ & - \frac{\phi_j}{8} \sum_t ((\Sigma_j)_{tt} + m_{tj}^2) \sum_i (x_t^{ij})^2 \\ & - \phi_j \log(\phi_j) - (1 - \phi_j) \log(1 - \phi_j). \end{aligned}$$

Observe  $f(\phi_j)$  is a smooth strictly concave function, so we can solve for  $\phi_j^*$  by stationary condition (i.e., 0 derivatives), which admit a closed form update:

$$\phi_j^* = \sigma(a). \quad (5)$$

where  $\sigma(t) := \frac{1}{\exp(-t)+1}$  denote the sigmoid function, and:

$$\begin{aligned} a & = \psi(\alpha) - \psi(\beta) + \sum_t \sum_i (y_t^i - \tilde{y}_t^i) m_{tj} x_t^{ij} \\ & + \frac{1}{4} \sum_t \sum_i (m_{tj} x_t^{ij}) \langle \mathbf{w}'_t \circ \mathbf{z}', \mathbf{x}_t^i \rangle \\ & - \frac{1}{4} \sum_t \sum_i m_{tj} x_t^{ij} \sum_{l \neq j} m_{tl} \phi_l x_t^{il} \\ & - \frac{1}{8} \sum_t ((\Sigma_j)_{tt} + m_{tj}^2) \sum_i (x_t^{ij})^2. \end{aligned}$$

323 When reference point of quadratic lower bound  $\mathbf{w}' \circ \mathbf{z}'$  is set to be the mean  
 324 parameters from the previous iterations, Eqn. 5 is simplified:

325  
 326 
$$\phi_j^{k+1} = \sigma(a). \tag{6}$$

327  
 328 where

329  
 330 
$$a = \psi(\alpha) - \psi(\beta) + \sum_t \sum_i \left( y_t^i - \tilde{y}_t^i \right) m_{tj} x_t^{ij}$$
  
 331  
 332 
$$+ \frac{1}{8} \sum_t \left( m_{tj}^2 \left( 2\phi_j^{(k)} - 1 \right) - (\Sigma_j)_{tt} \right) \sum_i \left( x_t^{ij} \right)^2.$$
  
 333  
 334

335 **3 Additional Experimental Results**

336  
 337 This section includes additional experimental results. We exam the methods using  
 338 more evaluation metrics including: accuracy, balanced accuracy, average precision, F1  
 339 score, F2 score, and Matthews correlation coefficient (MCC). Table 2 summarizes the  
 340 definitions of these metrics.  
 341

342  
 343

| Metric            | Definition                                                                                      |
|-------------------|-------------------------------------------------------------------------------------------------|
| TP                | $\sum_{i=1}^N \mathbf{1}(y_i = 1 \wedge \hat{y}_i = 1)$                                         |
| TN                | $\sum_{i=1}^N \mathbf{1}(y_i = 0 \wedge \hat{y}_i = 0)$                                         |
| FP                | $\sum_{i=1}^N \mathbf{1}(y_i = 0 \wedge \hat{y}_i = 1)$                                         |
| FN                | $\sum_{i=1}^N \mathbf{1}(y_i = 1 \wedge \hat{y}_i = 0)$                                         |
| Precision         | $\frac{TP}{TP+FP}$                                                                              |
| Recall            | $\frac{TP}{TP+FN}$                                                                              |
| Accuracy          | $\frac{TP+TN}{N}$                                                                               |
| Balanced Accuracy | $\frac{1}{2} \left( \frac{TP}{TP+FN} + \frac{TN}{TN+FP} \right)$                                |
| F1 Score          | $\frac{2 \cdot \text{Precision} \cdot \text{Recall}}{\text{Precision} + \text{Recall}}$         |
| F2 Score          | $\frac{5 \cdot \text{Precision} \cdot \text{Recall}}{4 \cdot \text{Precision} + \text{Recall}}$ |
| MCC               | $\frac{(TP \cdot TN) - (FP \cdot FN)}{\sqrt{(TP+FP)(TP+FN)(TN+FP)(TN+FN)}}$                     |

344  
 345  
 346  
 347  
 348  
 349  
 350  
 351  
 352  
 353  
 354  
 355  
 356  
 357  
 358  
 359  
 360 **Table 2:** Definitions of classification metrics and the inter-  
 361 mediate variables given ground truth labels  $\mathbf{y}$  and predicted  
 362 labels  $\hat{\mathbf{y}}$ .  $\wedge$  denotes the "and" operation, and  $\mathbf{1}(\cdot)$  is the indi-  
 363 cator function, which is 1 if the condition inside is true and  
 364 0 otherwise.  
 365  
 366  
 367  
 368

### 3.1 Synthetic Datasets

This subsection include the detailed experimental results on the synthetic datasets summarized in Table 3

| Dataset                                      | Metrics           | BayesMTL            | MTFL                | MSSL                | STL-LC              | Pooled-LC     |
|----------------------------------------------|-------------------|---------------------|---------------------|---------------------|---------------------|---------------|
| dataset1<br>(dense,<br>balanced)             | Accuracy          | 0.322 (0.06)        | <b>0.793</b> (0.05) | <b>0.793</b> (0.05) | 0.688 (0.05)        | 0.71 (0.04)   |
|                                              | Balanced Accuracy | <b>0.565</b> (0.03) | 0.5 (0)             | 0.5 (0)             | 0.525 (0.05)        | 0.52 (0.03)   |
|                                              | Average Precision | <b>0.819</b> (0.05) | 0.793 (0.05)        | 0.793 (0.05)        | 0.803 (0.04)        | 0.800 (0.05)  |
|                                              | F1 Score          | 0.261 (0.06)        | <b>0.884</b> (0.03) | <b>0.884</b> (0.03) | 0.801 (0.04)        | 0.821 (0.03)  |
|                                              | F2 Score          | 0.183 (0.05)        | <b>0.950</b> (0.01) | <b>0.950</b> (0.01) | 0.800 (0.05)        | 0.834 (0.03)  |
|                                              | MCC               | <b>0.156</b> (0.06) | 0 (0)               | 0 (0)               | 0.0565 (0.09)       | 0.0427 (0.07) |
| dataset2<br>(sparse,<br>balanced)            | Accuracy          | <b>0.882</b> (0.04) | 0.225 (0.03)        | 0.225 (0.03)        | 0.438 (0.08)        | 0.364 (0.02)  |
|                                              | Balanced Accuracy | <b>0.768</b> (0.05) | 0.5 (0)             | 0.5 (0)             | 0.616 (0.05)        | 0.548 (0.04)  |
|                                              | Average Precision | <b>0.597</b> (0.10) | 0.225 (0.03)        | 0.225 (0.03)        | 0.279 (0.06)        | 0.244 (0.02)  |
|                                              | F1 Score          | <b>0.681</b> (0.09) | 0.367 (0.03)        | 0.367 (0.03)        | 0.431 (0.07)        | 0.383 (0.03)  |
|                                              | F2 Score          | 0.602 (0.09)        | 0.590 (0.03)        | 0.590 (0.03)        | <b>0.634</b> (0.06) | 0.579 (0.04)  |
|                                              | MCC               | <b>0.638</b> (0.10) | 0 (0)               | 0 (0)               | 0.227 (0.09)        | 0.104 (0.07)  |
| dataset3<br>(ultra<br>sparse,<br>balanced)   | Accuracy          | <b>0.988</b> (0.02) | 0.0350 (0.01)       | 0.0350 (0.01)       | 0.437 (0.08)        | 0.199 (0.04)  |
|                                              | Balanced Accuracy | <b>0.947</b> (0.06) | 0.5 (0)             | 0.5 (0)             | 0.708 (0.04)        | 0.526 (0.09)  |
|                                              | Average Precision | <b>0.801</b> (0.20) | 0.035 (0.01)        | 0.035 (0.01)        | 0.0584 (0.01)       | 0.0372 (0.01) |
|                                              | F1 Score          | <b>0.876</b> (0.13) | 0.0674 (0.02)       | 0.0674 (0.02)       | 0.110 (0.02)        | 0.070 (0.02)  |
|                                              | F2 Score          | <b>0.886</b> (0.12) | 0.152 (0.04)        | 0.152 (0.04)        | 0.235 (0.05)        | 0.154 (0.04)  |
|                                              | MCC               | <b>0.879</b> (0.13) | 0 (0)               | 0 (0)               | 0.154 (0.02)        | 0.0199 (0.08) |
| dataset4<br>(dense,<br>unbalanced)           | Accuracy          | 0.441 (0.12)        | <b>0.795</b> (0.04) | <b>0.795</b> (0.04) | 0.689 (0.09)        | 0.693 (0.04)  |
|                                              | Balanced Accuracy | <b>0.584</b> (0.06) | 0.5 (0)             | 0.5 (0)             | 0.554 (0.07)        | 0.517 (0.04)  |
|                                              | Average Precision | <b>0.827</b> (0.04) | 0.795 (0.04)        | 0.795 (0.04)        | 0.814 (0.04)        | 0.801 (0.04)  |
|                                              | F1 Score          | 0.483 (0.16)        | <b>0.885</b> (0.02) | <b>0.885</b> (0.02) | 0.794 (0.08)        | 0.808 (0.03)  |
|                                              | F2 Score          | 0.393 (0.15)        | <b>0.951</b> (0.01) | <b>0.951</b> (0.01) | 0.788 (0.12)        | 0.813 (0.04)  |
|                                              | MCC               | <b>0.147</b> (0.09) | 0 (0)               | 0 (0)               | 0.118 (0.12)        | 0.039 (0.08)  |
| dataset5<br>(sparse,<br>unbalanced)          | Accuracy          | <b>0.796</b> (0.07) | 0.219 (0.04)        | 0.219 (0.04)        | 0.451 (0.07)        | 0.334 (0.03)  |
|                                              | Balanced Accuracy | <b>0.783</b> (0.06) | 0.5 (0)             | 0.5 (0)             | 0.626 (0.036)       | 0.541 (0.04)  |
|                                              | Average Precision | <b>0.472</b> (0.13) | 0.219 (0.04)        | 0.219 (0.04)        | 0.275 (0.05)        | 0.234 (0.03)  |
|                                              | F1 Score          | <b>0.625</b> (0.1)  | 0.358 (0.05)        | 0.358 (0.05)        | 0.427 (0.06)        | 0.370 (0.04)  |
|                                              | F2 Score          | <b>0.694</b> (0.05) | 0.579 (0.06)        | 0.579 (0.06)        | 0.630 (0.05)        | 0.569 (0.04)  |
|                                              | MCC               | <b>0.516</b> (0.13) | 0 (0)               | 0 (0)               | 0.240 (0.05)        | 0.086 (0.08)  |
| dataset6<br>(ultra<br>sparse,<br>unbalanced) | Accuracy          | <b>0.917</b> (0.10) | 0.059 (0.0239)      | 0.059 (0.0239)      | 0.478 (0.07)        | 0.21 (0.04)   |
|                                              | Balanced Accuracy | <b>0.905</b> (0.08) | 0.5 (0)             | 0.5 (0)             | 0.715 (0.05)        | 0.553 (0.03)  |
|                                              | Average Precision | <b>0.598</b> (0.02) | 0.059 (0.02)        | 0.059 (0.02)        | 0.097 (0.03)        | 0.0646 (0.02) |
|                                              | F1 Score          | <b>0.699</b> (0.27) | 0.11 (0.04)         | 0.11 (0.04)         | 0.176 (0.05)        | 0.120 (0.04)  |
|                                              | F2 Score          | <b>0.763</b> (0.20) | 0.233 (0.08)        | 0.233 (0.08)        | 0.343 (0.08)        | 0.246 (0.07)  |
|                                              | MCC               | <b>0.704</b> (0.26) | 0 (0)               | 0 (0)               | 0.198 (0.03)        | 0.063 (0.03)  |

**Table 3:** Summary of the support recovery results for the simulated data. The bold number means the corresponding method is the best performing algorithm for the given metrics and dataset, and the values in parentheses represent standard deviations computed over 10 different runs. The proposed Bayesian approach outperforms the benchmark methods in all evaluation metrics when there is a shared sparsity structure across regression coefficients of different tasks. Both MSSL and MTFL prioritize the prediction performance in the cross-validation step which results in complete dense solutions (i.e all regression coefficients are non-zero), hence they have identical results.

### 3.2 Microbiome Data

This subsection include the additional experimental results on the microbiome data: table 4 includes the evaluations of the prediction performance, Fig. 1 and Fig. 2 include the predicted probabilities on training and test data for the other taxonomic ranks

415 respectively, Fig. 3 includes the additional calibration curves, Fig. 4 shows the full set  
 416 of disease-specific feature-sparsity visualizations at the Class rank, and Fig. 5 provides  
 417 a compact cross-rank overview of the taxID (feature) selection-stability curves.  
 418

| Taxon Ranks | Metrics           | BayesMTL                | MTFL                   | MSSL                   | Pooled-LC       | STL-LC                  |
|-------------|-------------------|-------------------------|------------------------|------------------------|-----------------|-------------------------|
| Kingdom     | Accuracy          | 0.681 (0.00956)         | <b>0.685 (0.0116)</b>  | <b>0.685 (0.0121)</b>  | 0.532 (0.00974) | 0.618 (0.00725)         |
|             | Average Precision | 0.572 (0.00897)         | 0.578 (0.00981)        | <b>0.582 (0.00999)</b> | 0.542 (0.00297) | 0.57 (0.00872)          |
|             | Balanced Accuracy | 0.578 (0.0131)          | 0.581 (0.0124)         | <b>0.589 (0.0137)</b>  | 0.531 (0.00856) | 0.584 (0.0105)          |
|             | F1 Score          | 0.588 (0.0163)          | 0.587 (0.0147)         | <b>0.59 (0.0121)</b>   | 0.474 (0.0106)  | 0.523 (0.0284)          |
|             | F2 Score          | <b>0.602 (0.0182)</b>   | 0.598 (0.0126)         | 0.598 (0.0104)         | 0.489 (0.0116)  | 0.547 (0.0365)          |
|             | mcc               | 0.171 (0.0281)          | 0.178 (0.0309)         | <b>0.19 (0.0345)</b>   | 0.0622 (0.0169) | 0.157 (0.0217)          |
|             | Sparsity Ratio    | 0.288 (0.0102)          | 0.541 (0.0298)         | 0.467 (0.0267)         | 0.883 (0.0408)  | <b>0.263 (0.0203)</b>   |
| Phylum      | Accuracy          | 0.689 (0.0178)          | <b>0.715 (0.0159)</b>  | 0.701 (0.0174)         | 0.552 (0.00715) | 0.655 (0.01)            |
|             | Average Precision | 0.598 (0.00862)         | 0.615 (0.00804)        | <b>0.621 (0.00927)</b> | 0.538 (0.00385) | 0.593 (0.00802)         |
|             | Balanced Accuracy | 0.618 (0.0146)          | 0.64 (0.0147)          | <b>0.651 (0.0151)</b>  | 0.527 (0.0085)  | 0.612 (0.00993)         |
|             | F1 Score          | 0.614 (0.0153)          | <b>0.63 (0.018)</b>    | 0.627 (0.0158)         | 0.521 (0.00613) | 0.579 (0.0387)          |
|             | F2 Score          | 0.619 (0.0203)          | <b>0.63 (0.0222)</b>   | 0.619 (0.0193)         | 0.536 (0.00786) | 0.601 (0.0431)          |
|             | mcc               | 0.243 (0.0309)          | 0.294 (0.033)          | <b>0.302 (0.033)</b>   | 0.0458 (0.0139) | 0.222 (0.0223)          |
|             | Sparsity Ratio    | 0.182 (0.0169)          | 0.301 (0.00222)        | 0.311 (0.00286)        | 0.781 (0.0247)  | <b>0.0856 (0.012)</b>   |
| Class       | Accuracy          | 0.688 (0.00922)         | <b>0.726 (0.0099)</b>  | 0.695 (0.0156)         | 0.58 (0.0163)   | 0.668 (0.013)           |
|             | Average Precision | 0.599 (0.0107)          | <b>0.625 (0.00884)</b> | 0.623 (0.0116)         | 0.548 (0.0061)  | 0.605 (0.00575)         |
|             | Balanced Accuracy | 0.619 (0.013)           | <b>0.659 (0.0114)</b>  | 0.656 (0.0167)         | 0.544 (0.0121)  | 0.629 (0.00728)         |
|             | F1 Score          | 0.619 (0.0143)          | <b>0.652 (0.0134)</b>  | 0.632 (0.016)          | 0.54 (0.0155)   | 0.584 (0.0269)          |
|             | F2 Score          | 0.624 (0.0167)          | <b>0.657 (0.0155)</b>  | 0.625 (0.0188)         | 0.552 (0.0159)  | 0.603 (0.037)           |
|             | mcc               | 0.245 (0.0261)          | <b>0.326 (0.0237)</b>  | 0.307 (0.0324)         | 0.0803 (0.031)  | 0.26 (0.0151)           |
|             | Sparsity Ratio    | 0.116 (0.0121)          | 0.24 (0.00565)         | 0.295 (0.0531)         | 0.692 (0.019)   | <b>0.0697 (0.00536)</b> |
| Order       | Accuracy          | 0.698 (0.01)            | <b>0.703 (0.0116)</b>  | 0.68 (0.012)           | 0.6 (0.00926)   | 0.68 (0.0142)           |
|             | Average Precision | 0.609 (0.00955)         | 0.618 (0.00827)        | <b>0.622 (0.00906)</b> | 0.558 (0.0044)  | 0.617 (0.00803)         |
|             | Balanced Accuracy | 0.634 (0.0126)          | 0.655 (0.0123)         | <b>0.659 (0.0131)</b>  | 0.557 (0.00793) | 0.645 (0.0119)          |
|             | F1 Score          | 0.629 (0.00964)         | <b>0.649 (0.018)</b>   | 0.623 (0.0202)         | 0.553 (0.0147)  | 0.574 (0.0121)          |
|             | F2 Score          | 0.633 (0.0112)          | <b>0.659 (0.0238)</b>  | 0.618 (0.0269)         | 0.566 (0.0169)  | 0.589 (0.0171)          |
|             | mcc               | 0.271 (0.0234)          | <b>0.309 (0.0279)</b>  | 0.306 (0.0237)         | 0.112 (0.0148)  | 0.29 (0.023)            |
|             | Sparsity Ratio    | 0.109 (0.0115)          | 0.199 (0.00967)        | 0.222 (0.00103)        | 0.536 (0.00935) | <b>0.046 (0.00772)</b>  |
| Family      | Accuracy          | 0.704 (0.0218)          | 0.687 (0.0148)         | 0.665 (0.014)          | 0.608 (0.0162)  | <b>0.706 (0.00802)</b>  |
|             | Average Precision | 0.613 (0.0168)          | 0.625 (0.0144)         | 0.621 (0.0145)         | 0.567 (0.0104)  | <b>0.632 (0.00636)</b>  |
|             | Balanced Accuracy | 0.643 (0.0256)          | 0.658 (0.0149)         | 0.656 (0.0139)         | 0.57 (0.0179)   | <b>0.663 (0.00637)</b>  |
|             | F1 Score          | 0.627 (0.0239)          | 0.62 (0.0171)          | 0.616 (0.0123)         | 0.565 (0.0172)  | <b>0.632 (0.0184)</b>   |
|             | F2 Score          | 0.631 (0.0235)          | 0.609 (0.0223)         | 0.612 (0.0126)         | 0.574 (0.0164)  | <b>0.648 (0.0183)</b>   |
|             | mcc               | 0.285 (0.0516)          | 0.307 (0.0286)         | 0.298 (0.0279)         | 0.134 (0.0366)  | <b>0.326 (0.00791)</b>  |
|             | Sparsity Ratio    | 0.0429 (0.0151)         | 0.409 (x0.293)         | 0.172 (0.00179)        | 0.414 (0.00336) | <b>0.0407 (0.00736)</b> |
| x Genus     | Accuracy          | 0.707 (0.00852)         | 0.65 (0.0291)          | 0.66 (0.0156)          | 0.619 (0.00865) | <b>0.728 (0.0158)</b>   |
|             | Average Precision | 0.616 (0.00589)         | 0.609 (0.0168)         | 0.62 (0.0123)          | 0.575 (0.00737) | <b>0.647 (0.00831)</b>  |
|             | Balanced Accuracy | 0.641 (0.0109)          | 0.642 (0.0238)         | 0.657 (0.0135)         | 0.593 (0.0123)  | <b>0.683 (0.00959)</b>  |
|             | F1 Score          | 0.634 (0.00774)         | 0.562 (0.109)          | 0.612 (0.0143)         | 0.579 (0.0167)  | <b>0.638 (0.0267)</b>   |
|             | F2 Score          | 0.638 (0.00785)         | 0.562 (0.11)           | 0.61 (0.015)           | 0.589 (0.0219)  | <b>0.649 (0.0305)</b>   |
|             | mcc               | 0.288 (0.0204)          | 0.272 (0.0468)         | 0.3 (0.0265)           | 0.175 (0.0246)  | <b>0.366 (0.02)</b>     |
|             | Sparsity Ratio    | <b>0.0181 (0.00677)</b> | 0.403 (0.281)          | 0.152 (0.00116)        | 0.326 (0.00331) | 0.0351 (0.00621)        |
| Species     | Accuracy          | 0.711 (0.0143)          | 0.57 (0.0205)          | 0.672 (0.0106)         | 0.648 (0.0113)  | <b>0.744 (0.0145)</b>   |
|             | Average Precision | 0.621 (0.015)           | 0.57 (0.00941)         | 0.628 (0.00825)        | 0.593 (0.00687) | <b>0.66 (0.0119)</b>    |
|             | Balanced Accuracy | 0.65 (0.0168)           | 0.584 (0.0158)         | 0.671 (0.0117)         | 0.626 (0.0103)  | <b>0.7 (0.0132)</b>     |
|             | F1 Score          | 0.635 (0.0168)          | 0.301 (0.0674)         | 0.622 (0.0108)         | 0.611 (0.00954) | <b>0.651 (0.0222)</b>   |
|             | F2 Score          | 0.634 (0.0146)          | 0.297 (0.0656)         | 0.618 (0.0136)         | 0.625 (0.0128)  | <b>0.661 (0.0244)</b>   |
|             | mcc               | 0.305 (0.0333)          | 0.16 (0.0288)          | 0.325 (0.023)          | 0.234 (0.0202)  | <b>0.401 (0.0279)</b>   |
|             | Sparsity Ratio    | <b>0.0289 (0.0053)</b>  | 0.149 (0.0275)         | 0.149 (0.000836)       | 0.279 (0.00367) | 0.0319 (0.00481)        |

447 **Table 4:** Summary of the prediction performance. The bold number means the corre-  
 448 sponding method is the best performing algorithm for the given metrics and taxonomic  
 449 rank, and the values in parentheses represent standard deviations computed over 5 dif-  
 450 ferent runs. Due to the heterogeneous nature of the data, we do not see an improvement  
 451 of the proposed approach over single-task model. However, the proposed approach is  
 452 the only multitask method that provides a sparse solution i.e identify common bacteria  
 453 across studies of the same disease categories that are informative for the predictions.  
 454

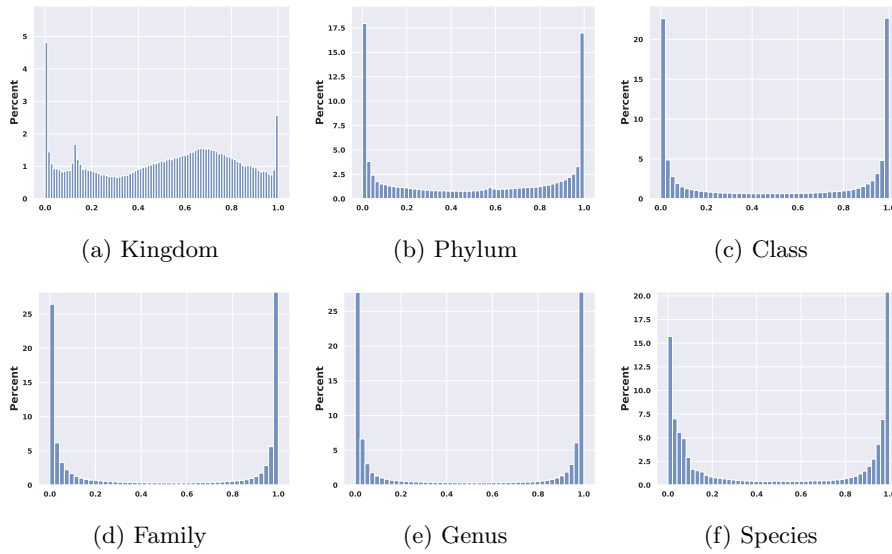

**Fig. 1:** Histogram of predicted probabilities on *training* data for different taxonomic ranks.

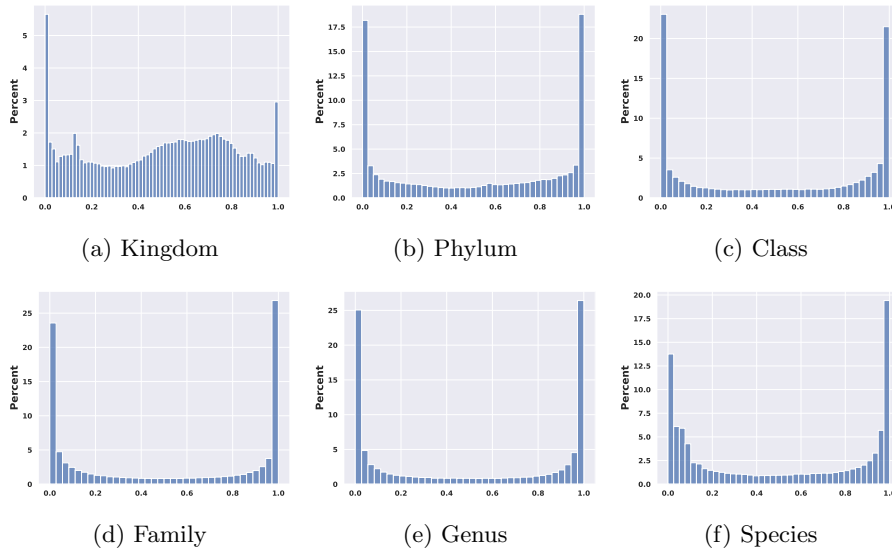

**Fig. 2:** Histogram of predicted probabilities on *test* data for different taxonomic ranks.

507  
508  
509  
510  
511  
512  
513  
514  
515  
516  
517  
518  
519  
520  
521  
522  
523  
524  
525  
526  
527  
528  
529  
530  
531  
532  
533  
534  
535  
536  
537  
538  
539  
540  
541  
542  
543  
544  
545  
546  
547  
548  
549  
550  
551  
552

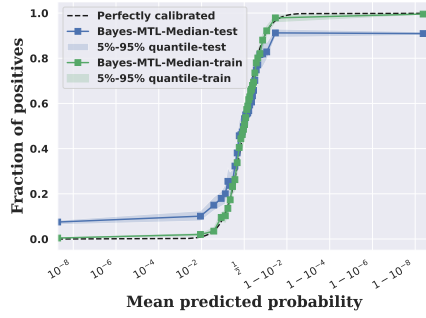

(a) Kingdom

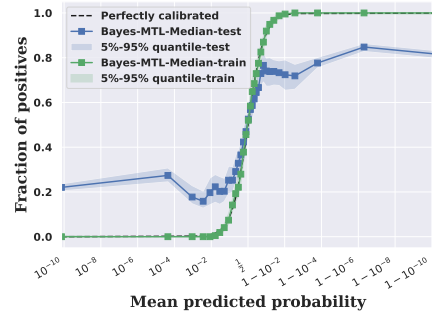

(b) Phylum

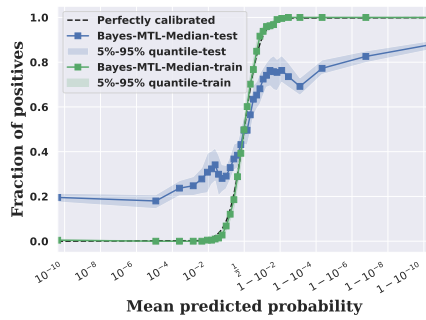

(c) Class

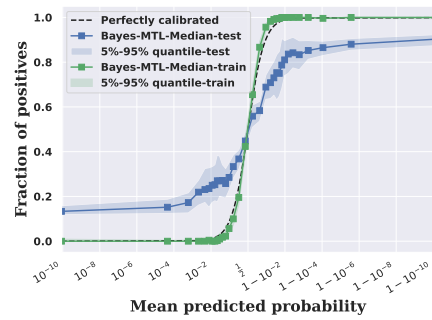

(d) Family

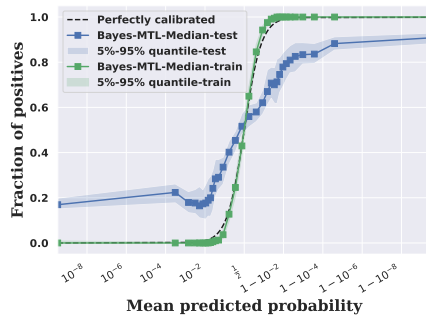

(e) Genus

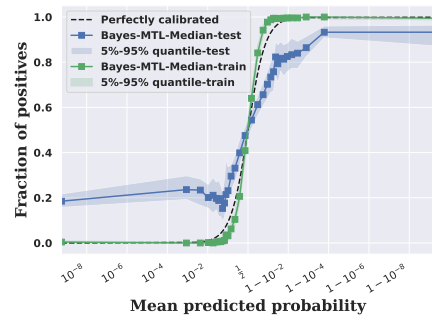

(f) Species

**Fig. 3:** Calibration curves for the proposed BayesMTL model for different taxonomic ranks.

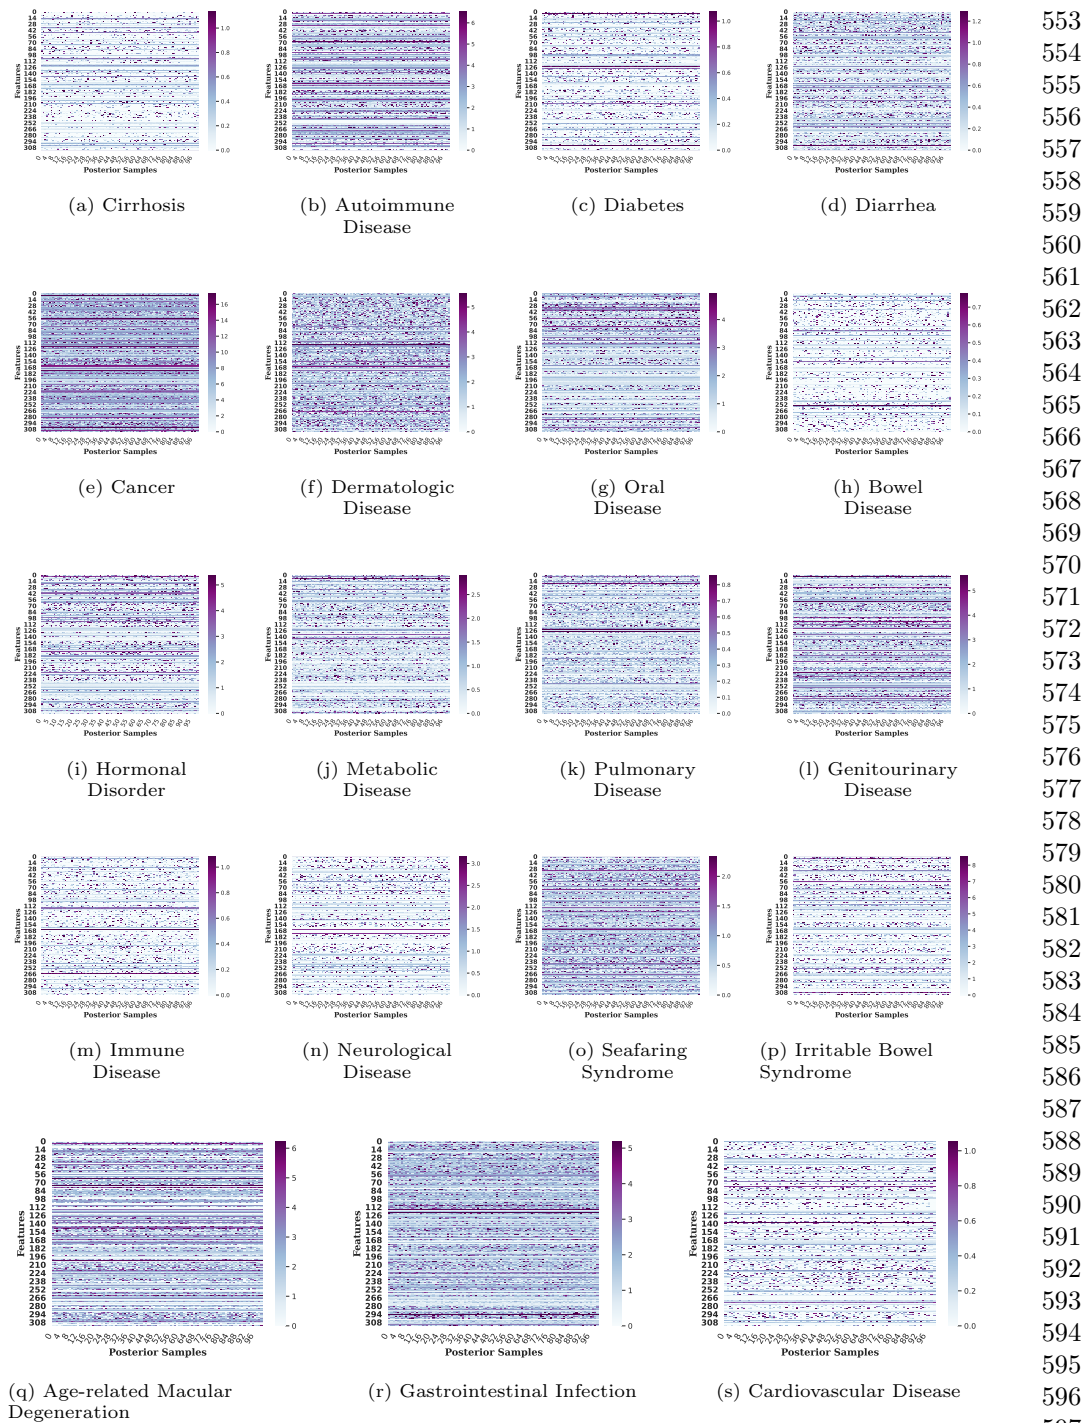

**Fig. 4:** Feature sparsity visualization across 19 different disease categories of Class taxonomic rank. The  $x$ -axis corresponds to different samples drawn from the posterior distribution and the  $y$ -axis correspond to different taxIDs. The gradation from white to black for variable color corresponds to its increasing importance weight, and the darker shaded horizontal lines represent the sparse features selected by the algorithm. For diabetes and diarrhea, few taxIDs are considered informative for the health prediction task by the model, while for cardiovascular disease the majority of taxIDs are considered informative.

553  
554  
555  
556  
557  
558  
559  
560  
561  
562  
563  
564  
565  
566  
567  
568  
569  
570  
571  
572  
573  
574  
575  
576  
577  
578  
579  
580  
581  
582  
583  
584  
585  
586  
587  
588  
589  
590  
591  
592  
593  
594  
595  
596  
597  
598



## References

- [1] Pasolli E, Schiffer L, Manghi P, Renson A, Obenchain V, Truong DT, et al. Accessible, curated metagenomic data through ExperimentHub. *Nature methods*. 2017;14(11):1023–1024. 645  
646  
647  
648  
649
- [2] Zysset-Burri DC, Keller I, Berger LE, Largiadèr CR, Wittwer M, Wolf S, et al. Associations of the intestinal microbiome with the complement system in neovascular age-related macular degeneration. *NPJ genomic medicine*. 2020;5(1):34. 650  
651  
652  
653  
654  
655
- [3] McDonald D, Hyde E, Debelius JW, Morton JT, Gonzalez A, Ackermann G, et al. American gut: an open platform for citizen science microbiome research. *Msystems*. 2018;3(3):10–1128. 656  
657  
658  
659
- [4] Karlsson FH, Tremaroli V, Nookaew I, Bergström G, Behre CJ, Fagerberg B, et al. Gut metagenome in European women with normal, impaired and diabetic glucose control. *Nature*. 2013;498(7452):99–103. 660  
661  
662  
663
- [5] Sankaranarayanan K, Ozga AT, Warinner C, Tito RY, Obregon-Tito AJ, Xu J, et al. Gut microbiome diversity among Cheyenne and Arapaho individuals from western Oklahoma. *Current Biology*. 2015;25(24):3161–3169. 664  
665  
666  
667
- [6] Heintz-Buschart A, May P, Laczny CC, Lebrun LA, Bellora C, Krishna A, et al. Integrated multi-omics of the human gut microbiome in a case study of familial type 1 diabetes. *Nature microbiology*. 2016;2(1):1–13. 668  
669  
670  
671
- [7] Qin N, Yang F, Li A, Prifti E, Chen Y, Shao L, et al. Alterations of the human gut microbiome in liver cirrhosis. *Nature*. 2014;513(7516):59–64. 672  
673  
674
- [8] Loomba R, Seguritan V, Li W, Long T, Klitgord N, Bhatt A, et al. Gut microbiome-based metagenomic signature for non-invasive detection of advanced fibrosis in human nonalcoholic fatty liver disease. *Cell metabolism*. 2019;30(3):607. 675  
676  
677  
678
- [9] Feng Q, Liang S, Jia H, Stadlmayr A, Tang L, Lan Z, et al. Gut microbiome development along the colorectal adenoma–carcinoma sequence. *Nature communications*. 2015;6(1):6528. 679  
680  
681  
682
- [10] Yu J, Feng Q, Wong SH, Zhang D, yi Liang Q, Qin Y, et al. Metagenomic analysis of faecal microbiome as a tool towards targeted non-invasive biomarkers for colorectal cancer. *Gut*. 2017;66(1):70–78. 683  
684  
685  
686
- [11] Hannigan GD, Duhaime MB, Ruffin IV MT, Koumpouras CC, Schloss PD. Diagnostic potential and interactive dynamics of the colorectal cancer virome. *MBio*. 2018;9(6):10–1128. 687  
688  
689  
690

- 691 [12] Yachida S, Mizutani S, Shiroma H, Shiba S, Nakajima T, Sakamoto T, et al.  
692 Metagenomic and metabolomic analyses reveal distinct stage-specific phenotypes  
693 of the gut microbiota in colorectal cancer. *Nature medicine*. 2019;25(6):968–976.  
694
- 695 [13] Nagata N, Nishijima S, Kojima Y, Hisada Y, Imbe K, Miyoshi-Akiyama T, et al.  
696 Metagenomic identification of microbial signatures predicting pancreatic cancer  
697 from a multinational study. *Gastroenterology*. 2022;163(1):222–238.  
698
- 699 [14] Castro-Nallar E, Bendall ML, Pérez-Losada M, Sabuncyan S, Severance EG,  
700 Dickerson FB, et al. Composition, taxonomy and functional diversity of the  
701 oropharynx microbiome in individuals with schizophrenia and controls. *PeerJ*.  
702 2015;3:e1140.  
703
- 704 [15] Nagy-Szakal D, Williams BL, Mishra N, Che X, Lee B, Bateman L, et al.  
705 Fecal metagenomic profiles in subgroups of patients with myalgic encephalomyeli-  
706 tis/chronic fatigue syndrome. *Microbiome*. 2017;5(1):1–17.  
707
- 708 [16] Qian Y, Yang X, Xu S, Huang P, Li B, Du J, et al. Gut metagenomics-derived  
709 genes as potential biomarkers of Parkinson’s disease. *Brain*. 2020;143(8):2474–  
710 2489.  
711
- 712 [17] Zhu F, Ju Y, Wang W, Wang Q, Guo R, Ma Q, et al. Metagenome-wide asso-  
713 ciation of gut microbiome features for schizophrenia. *Nature communications*.  
714 2020;11(1):1612.  
715
- 716 [18] Jo S, Kang W, Hwang YS, Lee SH, Park KW, Kim MS, et al. Oral and gut  
717 dysbiosis leads to functional alterations in Parkinson’s disease. *npj Parkinson’s*  
718 *Disease*. 2022;8(1):87.  
719
- 720 [19] Laske C, Müller S, Preische O, Ruschil V, Munk MH, Honold I, et al. Signature  
721 of Alzheimer’s disease in intestinal microbiome: results from the AlzBiom study.  
722 *Frontiers in Neuroscience*. 2022;16:792996.  
723
- 724 [20] Wallen ZD, Demirkan A, Twa G, Cohen G, Dean MN, Standaert DG, et al.  
725 Metagenomics of Parkinson’s disease implicates the gut microbiome in multiple  
726 disease mechanisms. *Nature communications*. 2022;13(1):6958.  
727
- 728 [21] David LA, Weil A, Ryan ET, Calderwood SB, Harris JB, Chowdhury F, et al.  
729 Gut microbial succession follows acute secretory diarrhea in humans. *MBio*.  
730 2015;6(3):10–1128.  
731
- 732 [22] Kieser S, Sarker SA, Sakwinska O, Foata F, Sultana S, Khan Z, et al. Bangladeshi  
733 children with acute diarrhoea show faecal microbiomes with increased *Streptococ-*  
734 *cus* abundance, irrespective of diarrhoea aetiology. *Environmental microbiology*.  
735 2018;20(6):2256–2269.  
736

- [23] Chng KR, Tay ASL, Li C, Ng AHQ, Wang J, Suri BK, et al. Whole metagenome profiling reveals skin microbiome-dependent susceptibility to atopic dermatitis flare. *Nature microbiology*. 2016;1(9):1–10. 737  
738  
739  
740
- [24] Byrd AL, Deming C, Cassidy SK, Harrison OJ, Ng WI, Conlan S, et al. *Staphylococcus aureus* and *Staphylococcus epidermidis* strain diversity underlying pediatric atopic dermatitis. *Science translational medicine*. 2017;9(397):eaal4651. 741  
742  
743  
744
- [25] Tay AS, Li C, Nandi T, Chng KR, Andiappan AK, Mettu VS, et al. Atopic dermatitis microbiomes stratify into ecologic dermatotypes enabling microbial virulence and disease severity. *Journal of Allergy and Clinical Immunology*. 2021;147(4):1329–1340. 745  
746  
747  
748  
749
- [26] Chang HW, Yan D, Singh R, Bui A, Lee K, Truong A, et al. Multiomic analysis of the gut microbiome in psoriasis reveals distinct host–microbe associations. *JID Innovations*. 2022;2(3):100115. 750  
751  
752  
753
- [27] Vincent C, Miller MA, Edens TJ, Mehrotra S, Dewar K, Manges AR. Bloom and bust: intestinal microbiota dynamics in response to hospital exposures and *Clostridium difficile* colonization or infection. *Microbiome*. 2016;4:1–11. 754  
755  
756  
757
- [28] Rosa BA, Supali T, Gankpala L, Djuardi Y, Sartono E, Zhou Y, et al. Differential human gut microbiome assemblages during soil-transmitted helminth infections in Indonesia and Liberia. *Microbiome*. 2018;6(1):1–19. 758  
759  
760  
761
- [29] Rubel MA, Abbas A, Taylor LJ, Connell A, Tanes C, Bittinger K, et al. Lifestyle and the presence of helminths is associated with gut microbiome composition in Cameroonians. *Genome biology*. 2020;21(1):1–32. 762  
763  
764  
765
- [30] Hall AB, Yassour M, Sauk J, Garner A, Jiang X, Arthur T, et al. A novel *Ruminococcus gnavus* clade enriched in inflammatory bowel disease patients. *Genome medicine*. 2017;9:1–12. 766  
767  
768  
769
- [31] Franzosa EA, Sirota-Madi A, Avila-Pacheco J, Fornelos N, Haiser HJ, Reinker S, et al. Gut microbiome structure and metabolic activity in inflammatory bowel disease. *Nature microbiology*. 2019;4(2):293–305. 770  
771  
772  
773
- [32] Integrative H. The Integrative Human Microbiome Project: dynamic analysis of microbiome-host omics profiles during periods of human health and disease. *Cell host & microbe*. 2014;16(3):276–289. 774  
775  
776  
777
- [33] Zuo W, Wang B, Bai X, Luan Y, Fan Y, Michail S, et al. 16S rRNA and metagenomic shotgun sequencing data revealed consistent patterns of gut microbiome signature in pediatric ulcerative colitis. *Scientific Reports*. 2022;12(1):6421. 778  
779  
780  
781
- [34] Jie Z, Xia H, Zhong SL, Feng Q, Li S, Liang S, et al. The gut microbiome in atherosclerotic cardiovascular disease. *Nature communications*. 2017;8(1):845. 782

- 783 [35] Li J, Zhao F, Wang Y, Chen J, Tao J, Tian G, et al. Gut microbiota dysbiosis  
784 contributes to the development of hypertension. *Microbiome*. 2017;5:1–19.  
785
- 786 [36] Yan Q, Gu Y, Li X, Yang W, Jia L, Chen C, et al. Alterations of the gut  
787 microbiome in hypertension. *Frontiers in cellular and infection microbiology*.  
788 2017;7:381.  
789
- 790 [37] Polster SP, Sharma A, Tanes C, Tang AT, Mericko P, Cao Y, et al. Permissive  
791 microbiome characterizes human subjects with a neurovascular disease cavernous  
792 angioma. *Nature communications*. 2020;11(1):2659.  
793
- 794 [38] Xiong Z, Peng K, Song S, Zhu Y, Gu J, Huang C, et al. Cerebral intraparenchymal  
795 hemorrhage changes patients' gut bacteria composition and function. *Frontiers in  
796 Cellular and Infection Microbiology*. 2022;12:829491.  
797
- 798 [39] Espinoza JL, Harkins DM, Torralba M, Gomez A, Highlander SK, Jones MB,  
799 et al. Supragingival plaque microbiome ecology and functional potential in the  
800 context of health and disease. *MBio*. 2018;9(6):10–1128.  
801
- 802 [40] Ghensi P, Manghi P, Zolfo M, Armanini F, Pasolli E, Bolzan M, et al. Strong  
803 oral plaque microbiome signatures for dental implant diseases identified by strain-  
804 resolution metagenomics. *npj Biofilms and Microbiomes*. 2020;6(1):47.  
805
- 806 [41] Wirth R, Maróti G, Lipták L, Mester M, Al Ayoubi A, Pap B, et al. Microbiomes  
807 in supragingival biofilms and saliva of adolescents with gingivitis and gingival  
808 health. *Oral Diseases*. 2022;28(7):2000–2014.  
809
- 810 [42] Ye Z, Zhang N, Wu C, Zhang X, Wang Q, Huang X, et al. A metagenomic study  
811 of the gut microbiome in Behcet's disease. *Microbiome*. 2018;6(1):1–13.  
812
- 813 [43] Zhu Q, Hou Q, Huang S, Ou Q, Huo D, Vázquez-Baeza Y, et al. Composi-  
814 tional and genetic alterations in Graves' disease gut microbiome reveal specific  
815 diagnostic biomarkers. *The ISME journal*. 2021;15(11):3399–3411.  
816
- 817 [44] Guillén Y, Noguera-Julian M, Rivera J, Casadellà M, Zevin AS, Rocafort M, et al.  
818 Low nadir CD4+ T-cell counts predict gut dysbiosis in HIV-1 infection. *Mucosal  
819 immunology*. 2019;12(1):232–246.  
820
- 821 [45] Hu Y, Feng Y, Wu J, Liu F, Zhang Z, Hao Y, et al. The gut microbiome signatures  
822 discriminate healthy from pulmonary tuberculosis patients. *Frontiers in cellular  
823 and infection microbiology*. 2019;9:90.  
824
- 825 [46] Pust MM, Wiehlmann L, Davenport C, Rudolf I, Dittrich AM, Tümmler B. The  
826 human respiratory tract microbial community structures in healthy and cystic  
827 fibrosis infants. *npj Biofilms and Microbiomes*. 2020;6(1):61.  
828

[47] Zuo T, Zhang F, Lui GC, Yeoh YK, Li AY, Zhan H, et al. Alterations in gut microbiota of patients with COVID-19 during time of hospitalization. *Gastroenterology*. 2020;159(3):944–955. 829  
830  
831  
832

[48] Bai X, Narayanan A, Skagerberg M, Ceña-Diez R, Giske CG, Strålin K, et al. Characterization of the upper respiratory bacterial microbiome in critically ill COVID-19 patients. *Biomedicines*. 2022;10(5):982. 833  
834  
835  
836

[49] Liu Q, Mak JWY, Su Q, Yeoh YK, Lui GCY, Ng SSS, et al. Gut microbiota dynamics in a prospective cohort of patients with post-acute COVID-19 syndrome. *Gut*. 2022;71(3):544–552. 837  
838  
839  
840

[50] Xiao G, Cai Z, Guo Q, Ye T, Tang Y, Guan P, et al. Insights into the unique lung microbiota profile of pulmonary tuberculosis patients using metagenomic next-generation sequencing. *Microbiology Spectrum*. 2022;10(1):e01901–21. 841  
842  
843  
844

[51] Zhang F, Wan Y, Zuo T, Yeoh YK, Liu Q, Zhang L, et al. Prolonged impairment of short-chain fatty acid and L-isoleucine biosynthesis in gut microbiome in patients with COVID-19. *Gastroenterology*. 2022;162(2):548–561. 845  
846  
847  
848

[52] Zhou T, Wu J, Zeng Y, Li J, Yan J, Meng W, et al. SARS-CoV-2 triggered oxidative stress and abnormal energy metabolism in gut microbiota. *MedComm*. 2022;3(1):e112. 849  
850  
851  
852

[53] Maya-Lucas O, Murugesan S, Nirmalkar K, Alcaraz LD, Hoyo-Vadillo C, Pizano-Zárate ML, et al. The gut microbiome of Mexican children affected by obesity. *Anaerobe*. 2019;55:11–23. 853  
854  
855  
856

[54] Qi X, Yun C, Sun L, Xia J, Wu Q, Wang Y, et al. Gut microbiota–bile acid–interleukin-22 axis orchestrates polycystic ovary syndrome. *Nature medicine*. 2019;25(8):1225–1233. 857  
858  
859  
860

[55] Bommana S, Richards G, Kama M, Kodimerla R, Jijakli K, Read TD, et al. Metagenomic shotgun sequencing of Endocervical, vaginal, and rectal samples among Fijian women with and without *Chlamydia trachomatis* reveals disparate microbial populations and function across anatomic sites: a pilot study. *Microbiology spectrum*. 2022;10(3):e00105–22. 861  
862  
863  
864  
865

[56] Sun Z, Zhang M, Li M, Bhaskar Y, Zhao J, Ji Y, et al. Interactions between human gut microbiome dynamics and sub-optimal health symptoms during seafaring expeditions. *Microbiology Spectrum*. 2022;10(1):e00925–21. 866  
867  
868  
869

[57] Blei DM, Kucukelbir A, McAuliffe JD. Variational inference: A review for statisticians. *Journal of the American statistical Association*. 2017;112(518):859–877. 870  
871  
872  
873  
874
